# Supplementary material for: A microfluidic array device for single cell capture and intracellular Ca2+ response analysis induced by dynamic biochemical stimulus
Source: Oxford University Press journal article supplement (doi:10.1042/bsr20210719), 2021-07-01
Supplement: bsr-2021-0719_supp.pdf [file bsr-2021-0719_supp.pdf]

## Supplementary Information

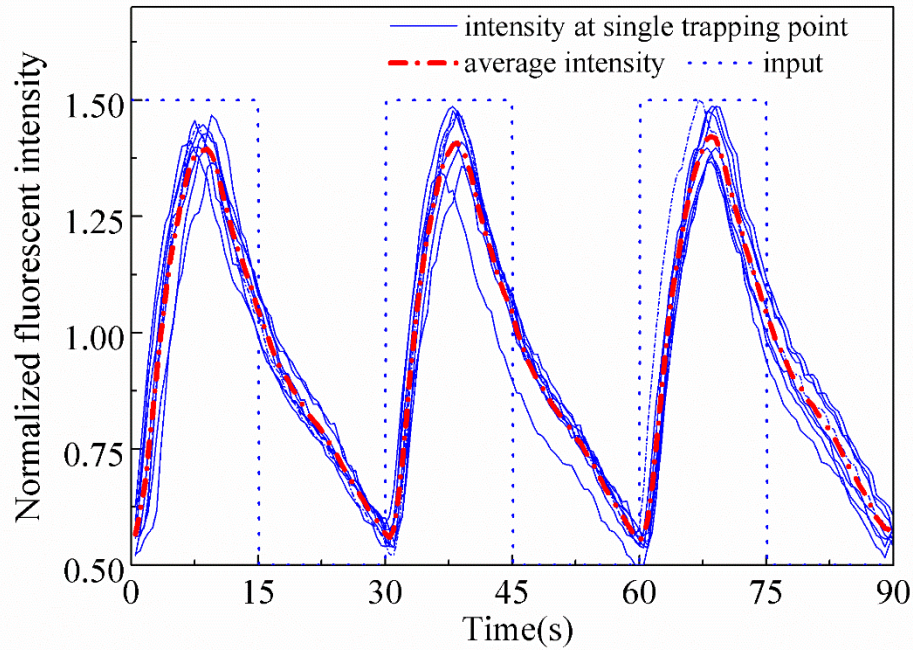

**Figure S1. Individual and average fluorescent stimulus profiles at individual cell capturing points of microfluidic array.**

Stimulus profiles at cell capturing point of microfluidic array with input dynamic stimuli with frequency  $f_C = 1/60$  Hz in the steady flow at  $Q = 5.4$  mL/h. Experimental results detected at  $x = 0.1$  cm.
